# Supplementary material for: Risk of adverse pregnancy outcomes in women with periodontal disease and the effectiveness of interventions in decreasing this risk: protocol for systematic overview of systematic reviews
Source: PubMed Central journal article supplement (PMC4735974; doi:10.1186/s13643-016-0195-7), 2016-02-01
Supplement: 13643_2016_195_MOESM2_ESM.pdf [file 13643_2016_195_MOESM2_ESM.pdf]

## Additional file 2: search strategy MEDLINE (Pubmed)

1. exp pregnancy/
2. pregnan\*.mp
3. gestation\*.mp
4. gravid\*.mp
5. preconception\*
6. conception
7. or/1-6
8. periodontal diseases/
9. gingival diseases/
10. exp gingivitis/
11. exp periodontitis/
12. periodontal index/
13. oral health/
14. periodontal disease\*.mp
15. gingiv\*.mp
16. gum disease\*.mp
17. "gingival health".mp
18. swollen gum\*.mp
19. "bleeding on probing".mp
20. periodont\*.mp
21. parodont\*.mp
22. paradont\*.mp
23. "periodontal index".mp
24. "oral health".mp
25. "oral disease".mp
26. or/8-25
27. review/
28. meta-analysis/
29. "systematic review".mp
30. review.mp
31. meta-analy\*.mp
32. metaanaly\*.mp
33. or/27-32
34. 7 AND 26 AND 33
